# Supplementary material
Source: PubMed Central journal article supplement (PMC6442954)
Supplement: 2018_206458-Disclosures_and_Contributions.pdf [file 2018_206458-Disclosures_and_Contributions.pdf]

Haematologica  
HAEMATOL/2018/206458  
Version 3

Recognition of hemophagocytic lymphohistiocytosis in sickle cell  
vasoocclusive crises is a potentially lifesaving diagnosis

Orly Leiva, Lillian McMahon, J. Mark Sloan, John Lee, and Adam  
Lerner

Disclosures: The authors state no conflict of interest relevant to the subject matter included in this manuscript.

Contributions: O.L. co-wrote the manuscript; L.M., M.S. and A.L. provided insights to the manuscript and participated in patients' care; J.L. was the pathologist for both patients and provided the images of the bone marrow aspirate.
